# Supplementary material for: A brain precursor atlas reveals the acquisition of developmental-like states in adult cerebral tumours
Source: PubMed Central journal article supplement (PMC9296666; doi:10.1038/s41467-022-31408-y), 2022-07-19
Supplement: 41467_2022_31408_MOESM2_ESM.pdf [file 41467_2022_31408_MOESM2_ESM.pdf]

### **Description of Additional Supplementary Files**

File Name: Supplementary Data 1

Description: A summary of the patient IDs related to Figures 4, 5 and Supplementary Fig. 8.

File Name: Supplementary Data 2

Description: Top 100 genes shared between each of the GBM patient tumour clusters and the mouse embryonic RGP cluster related to Supplementary Fig. 8b.
